# Supplementary material
Source: HighWire-hosted journal article supplement (https://erj.ersjournals.com/content/58/4/2004584)
Supplement: inline-supplementary-material-1 [file inline-supplementary-material-1.pdf]

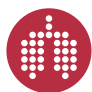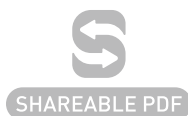

# Measurement of hypoxia in the lung in idiopathic pulmonary fibrosis: an F-MISO PET/CT study

Joanna C. Porter<sup>1,11</sup>, Thida Win<sup>2,11</sup>, Kjell Erlandsson<sup>3</sup>, Francesco Fraioli<sup>3</sup>, Alaleh Rashidnasab<sup>3</sup>, Beverley Holman<sup>3</sup>, Balaji Ganeshan<sup>3</sup>, Nicholas J. Screatton<sup>4</sup>, Toby M. Maher<sup>5,6,7</sup>, Raymond Endozo<sup>3</sup>, John Hoath<sup>3</sup>, Robert I. Shortman<sup>3</sup>, Elise Emond<sup>3</sup>, Kris Thielemans<sup>3</sup>, Brian F. Hutton<sup>3</sup>, Pauline T. Lukey<sup>8</sup>, Franklin Aigbirio<sup>9</sup>, Saif Khan<sup>10</sup>, Manuel Rodriguez-Justo<sup>10</sup> and Ashley M. Groves<sup>3</sup>

<sup>1</sup>CITR, UCL and Interstitial Lung Disease Centre, UCLH, London, UK. <sup>2</sup>Respiratory Medicine, Lister Hospital, Stevenage, UK. <sup>3</sup>Institute of Nuclear Medicine, UCL/H, London, UK. <sup>4</sup>Radiology Dept, Papworth Hospital, Papworth Everard, UK. <sup>5</sup>Hastings Centre for Pulmonary Research and Division of Pulmonary, Critical Care and Sleep Medicine, Keck School of Medicine, University of Southern California, Los Angeles, CA, USA. <sup>6</sup>Inflammation, Repair and Development Section, National Heart and Lung Institute, Imperial College, London, UK. <sup>7</sup>National Institute for Health Research (NIHR) Respiratory Biomedical Research Unit, Royal Brompton Hospital, London, UK. <sup>8</sup>Target to Treatment Consulting Ltd, Stevenage Bioscience Catalyst, Stevenage, UK. <sup>9</sup>Wolfson Brain Imaging Centre, University Cambridge, Cambridge, UK. <sup>10</sup>Dept of Histopathology, UCLH, London, UK. <sup>11</sup>Joint first authors.

Ashley Groves ([ashleygroves@nhs.net](mailto:ashleygroves@nhs.net))

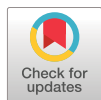

Shareable abstract (@ERSpublications)

**This study found no detectable <sup>18</sup>F-MISO signal in fibrotic lung despite some histological expression of hypoxic markers, and concludes that in these IPF patients, the degree of hypoxia is too low to be detectable with <sup>18</sup>F-MISO-PET/CT** <https://bit.ly/3wLJwja>

**Cite this article as:** Porter JC, Win T, Erlandsson K, *et al.* Measurement of hypoxia in the lung in idiopathic pulmonary fibrosis: an F-MISO PET/CT study. *Eur Respir J* 2021; 58: 2004584 [DOI: 10.1183/13993003.04584-2020].

This single-page version can be shared freely online.

Copyright ©The authors 2021. For reproduction rights and permissions contact [permissions@ersnet.org](mailto:permissions@ersnet.org)

Received: 5 Jan 2021  
Accepted: 4 June 2021

*To the Editor:*

Idiopathic pulmonary fibrosis (IPF) is a chronic fibrosing lung disease, with an incidence of ~1 per 10 000 per year, and a poor prognosis with limited treatments [1]. The role of hypoxia in disease progression is unclear.
